# Supplementary material for: Sintering and enhanced ferroelectric properties of textured Bi5Ti3FeO15 ceramics with high Curie temperature
Source: Royal Society of Chemistry journal article supplement (doi:10.1039/d4tc05030d), 2025-01-01
Supplement: d4tc05030d1.pdf [file d4tc05030d1.pdf]

## Supplementary Information

### Sintering and enhanced ferroelectric properties of textured

### **Bi<sub>5</sub>Ti<sub>3</sub>FeO<sub>15</sub> ceramics with high Curie temperature**

Jingxin Tian<sup>a,b,1</sup>, Fangzhe Li<sup>a,b,1</sup>, Xiaohui Tang<sup>a,b</sup>, Huijiadai Luo<sup>a,b</sup>, Lu Cao<sup>a,b</sup>, Shaojie Sun<sup>a,b</sup>, Changrong Liu<sup>c</sup>, Yong Huang<sup>d</sup>, Hua Ke<sup>a,b,\*</sup> and Yu Zhou<sup>a,b,c</sup>

<sup>a</sup> *Institute for Advanced Ceramics, School of Materials Science and Engineering, Harbin Institute of Technology, Harbin 150080, China*

<sup>b</sup> *State Key Laboratory of Precision Welding & Joining of Materials and Structures, School of Materials Science and Engineering, Harbin Institute of Technology, Harbin 150080, China*

<sup>c</sup> *School of Electronic and Information Engineering, Soochow University, Suzhou 215006, China*

<sup>d</sup> *Suzhou Bohai Microsystem Co., LTD., Suzhou 215000, China*

<sup>e</sup> *School of Materials Science and Engineering, Harbin Institute of Technology (Shenzhen), Shenzhen 518055, China*

<sup>1</sup> These two authors contributed equally to this work.

\* Corresponding author: Hua Ke; E-mail: hua\_ke@hit.edu.cn.

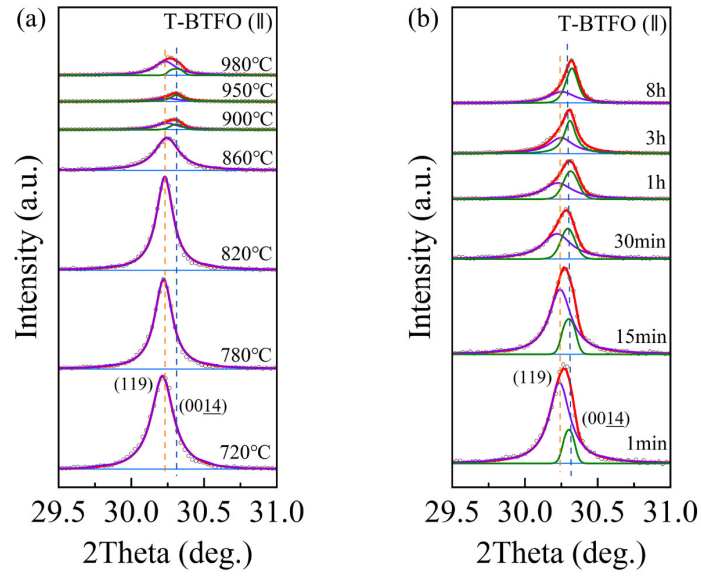

Fig.S1 The fitting results of (119) and (0014) peaks of T-BTFO (||) samples sintered at different temperatures and times.

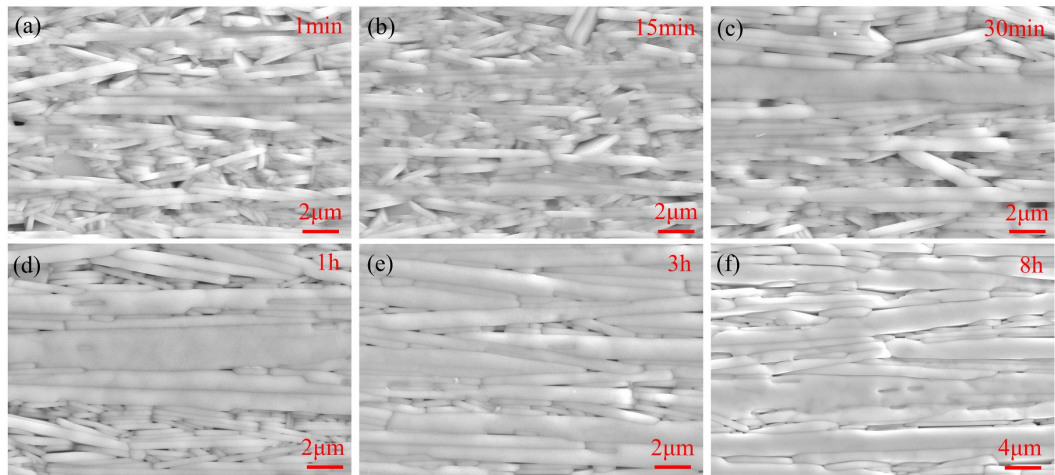

Fig.S2 SEM grain morphologies of T-BTFO (⊥) samples sintered at 950 °C for different times.

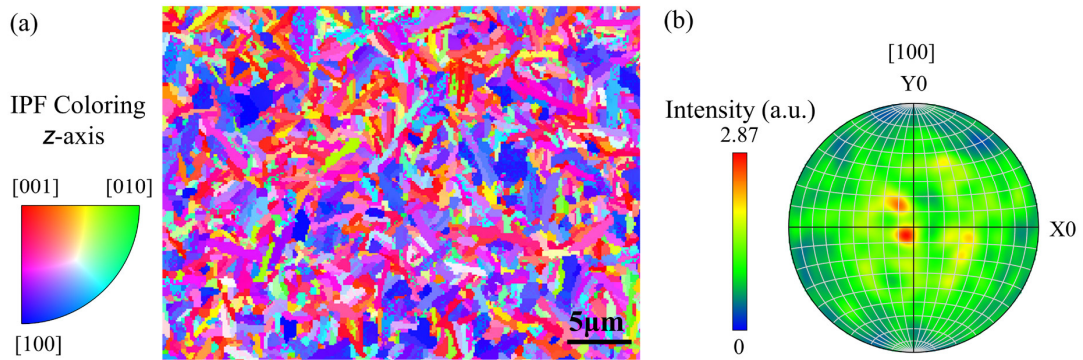

Fig.S3 EBSD inverse pole figure coloring and pole figure of R-BTFO sample.

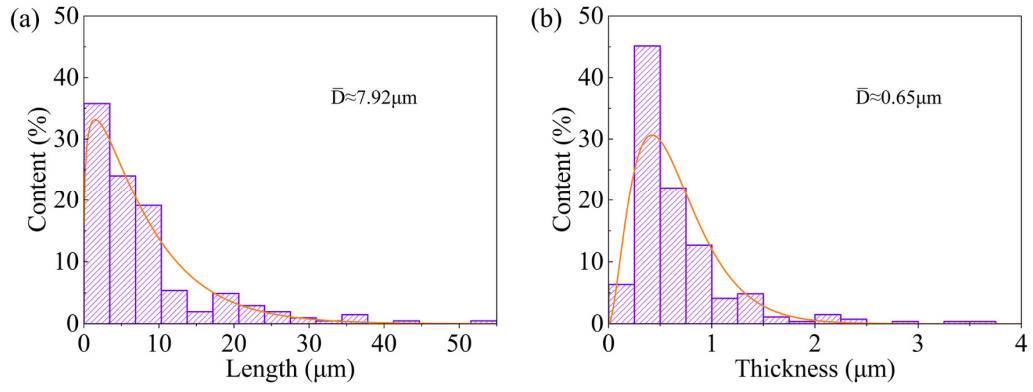

Fig.S4 The grain size distributions of textured BTFO ceramics (the curves present the distribution trend of the grain size).

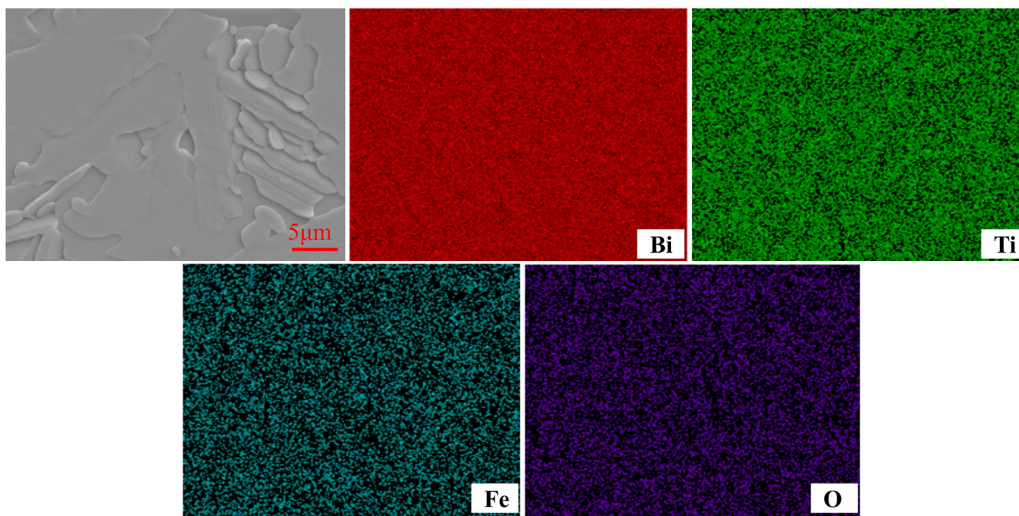

Fig.S5 EDS element distribution maps of T-BTFO (||) samples.

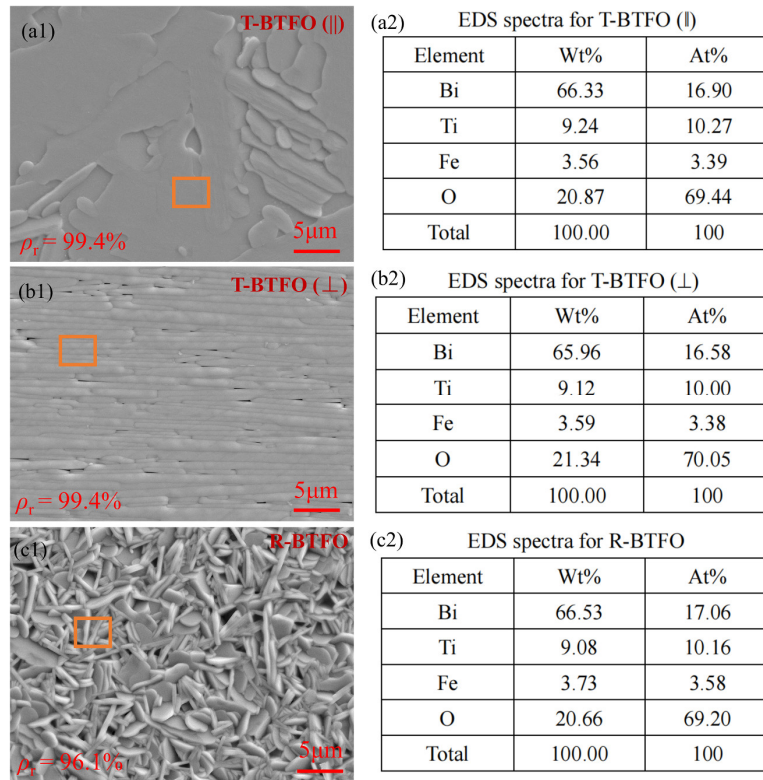

Fig.S6 EDS element content of textured and random BTFO ceramics (the EDS data is obtained in a rectangular region and the relative density is given).

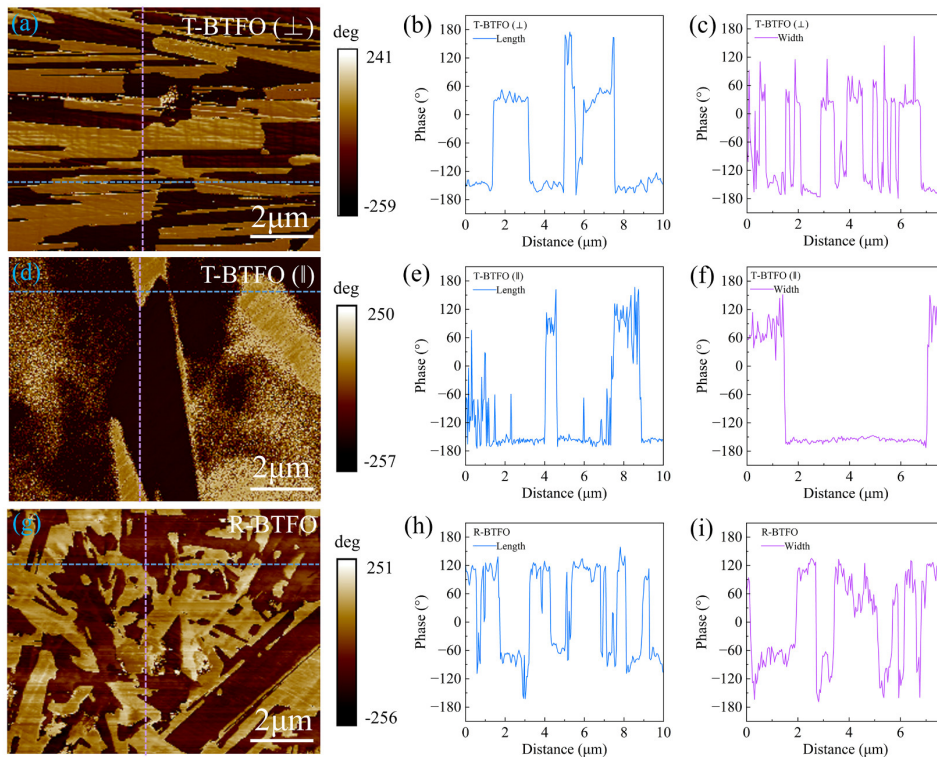

Fig.S7 The PFM phase images of textured and random BTFO ceramics and the corresponding change of phase images in two directions perpendicular to each other.
